# Supplementary material
Source: publisher figshare collection journal article supplement (https://acs.figshare.com/ndownloader/files/5053405)
Supplement: Supplementary file 1 [file 5053405]

## **Supporting Information:**

### **Efflux pump control alters synthetic gene circuit function**

Junchen Diao<sup>1</sup>, Daniel A. Charlebois<sup>2</sup>, Dmitry Nevozhay<sup>1,3</sup>, Zoltán Bódi<sup>4</sup>, Csaba Pál<sup>4</sup>, and Gábor Balázs<sup>1,2,5\*</sup>

<sup>1</sup> Department of Systems Biology – Unit 950, 7435 Fannin Street, The University of Texas MD Anderson Cancer Center, Houston, TX 77054, USA

<sup>2</sup> The Louis and Beatrice Laufer Center for Physical & Quantitative Biology, 115C Laufer Center, Z-5252, Stony Brook University, Stony Brook, NY 11794, USA

<sup>3</sup> School of Biomedicine, Far Eastern Federal University, 8 Sukhanova Street, Vladivostok, 690950, Russia

<sup>4</sup> Institute of Biochemistry, Biological Research Centre of the Hungarian Academy of Sciences, Temesvári krt. 62., H-6726 Szeged, Hungary

<sup>5</sup> Department of Biomedical Engineering, Z-5281, Stony Brook University, Stony Brook, NY 11794, USA

## SUPPORTING FIGURE LEGENDS

**Figure S1. Dose-responses of mean fluorescence intensity for NR cells with the native copy of *PDR5* present at its endogenous locus (black) versus NR cells with endogenous *PDR5* knocked out (magenta).** Dose-responses of mean fluorescence intensity (calculated using an average of 3 replicates) indicate that the presence/absence of *PDR5* at its native locus does not affect the dose-response.

**Figure S2. Fitting the NR model to the experimental data.** NR ODE, NR analytic, and NR experimental mean dose-responses. The parameters for NR ODE and NR analytic were obtained partly from an earlier study and partly by using Matlab's curve fitting toolbox (see the Methods and the legend of Fig. 2):  $a_x = a_z = 9.418 \text{ nM h}^{-1}$ ,  $l_z = 0.1 \text{ nM h}^{-1}$ ,  $b = 7.7877 \text{ nM}^{-1} \text{ h}^{-1}$ ,  $C = 1.837 \text{ [dox] h}^{-1}$ ,  $d = 0.1313 \text{ h}^{-1}$ ,  $f = 1.551 \text{ h}^{-1}$ ,  $n = 2$ ,  $\theta = 1.858 \text{ nM}$ , and  $k = 0 \text{ h}^{-1}$ .

**Figure S3. Dose-responses of NF fluorescence intensity mean after including the pump term, but without altering TetR synthesis rate.** This plot shows that the pump term alone (red) is insufficient to capture all aspects of the NF dose-response change (parameters for NF are as in Figure S2 except  $K = 100 \text{ nM}$ ,  $h = 2$ , and  $k = 200 \text{ h}^{-1}$ ).

**Figure S4. Dose-responses of fluorescence intensity mean without normalization.** (A) NR series: NR (black), NRpump (red), NRpumpmutant (green and blue); (B) NF series (colors: as for the NR series).

**Figure S5 Single-color and 2-color NF fluorescence mean dose-responses.** Dose-responses of mean fluorescence intensity (calculated using an average of 3 replicates) indicate linearity up to saturation. The different slopes are most likely due to fusing mCherry to TetR, which can alter synthesis and degradation rates, as well as protein function.

**Figure S6. Dose-responses of exponential growth rates.** (A) Cells grow exponentially over 12 hours. Natural logarithms of cell densities (circles) are shown for NR (blue) and NRpump (cyan) strains. The dashed lines are linear fits to the experimental data with slopes of 0.26129, and 0.30217, respectively. (B) Exponential growth rates at increasing doxycycline concentrations are shown for NR (blue), NRpump (cyan), NF(red) and NFpump (magenta) strains.

## SUPPORTING TABLE LEGEND

**Table S1. Parameter sensitivity analysis for the NRpump model.** The quality of the fits was measured using the L1-norm calculated from the difference between simulation results and experimental data for the 10 different doxycycline concentrations used in the dose response experiments:

$$Q = \sum_{i=1}^N |GFP_{simulation} - GFP_{experiment}|_i.$$

The L1-norms of GFP mean and GFP CV for the parameter set before reducing the repressor synthesis rate (as in Figure 2A,B) appear in the left and right columns labeled “0”, respectively. The L1-norms were then computed for each parameter in the model by independently varying them up or down twofold. An increase of two-times the parameter value from the main text appears in the column “+”, and a decrease by half appears in the column “-”. The best fits for GFP mean and GFP CV (lowest L1-norms) are shown in bold in each row. Most parameter changes that improved the fit of the GFP mean decreased the fit quality for the GFP CV and vice versa. The parameter changes that improved the fit (lower L1-norm compared to the “0” column) for both GFP mean and GFP CV are highlighted in yellow, and the overall best fit ( $a_x, -$ ) is highlighted in green. Note that increasing parameter  $C$  (inducer influx rate multiplier) is equivalent to decreasing TetR synthesis rate (since intracellular inducer inactivates TetR).

# Figure S1

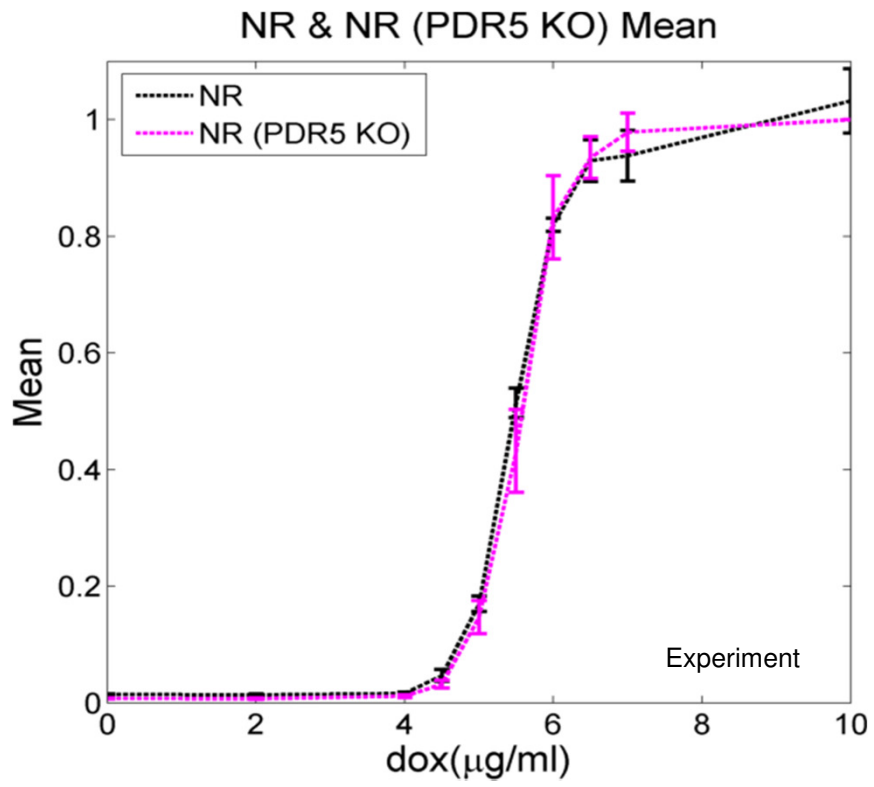

Figure S2

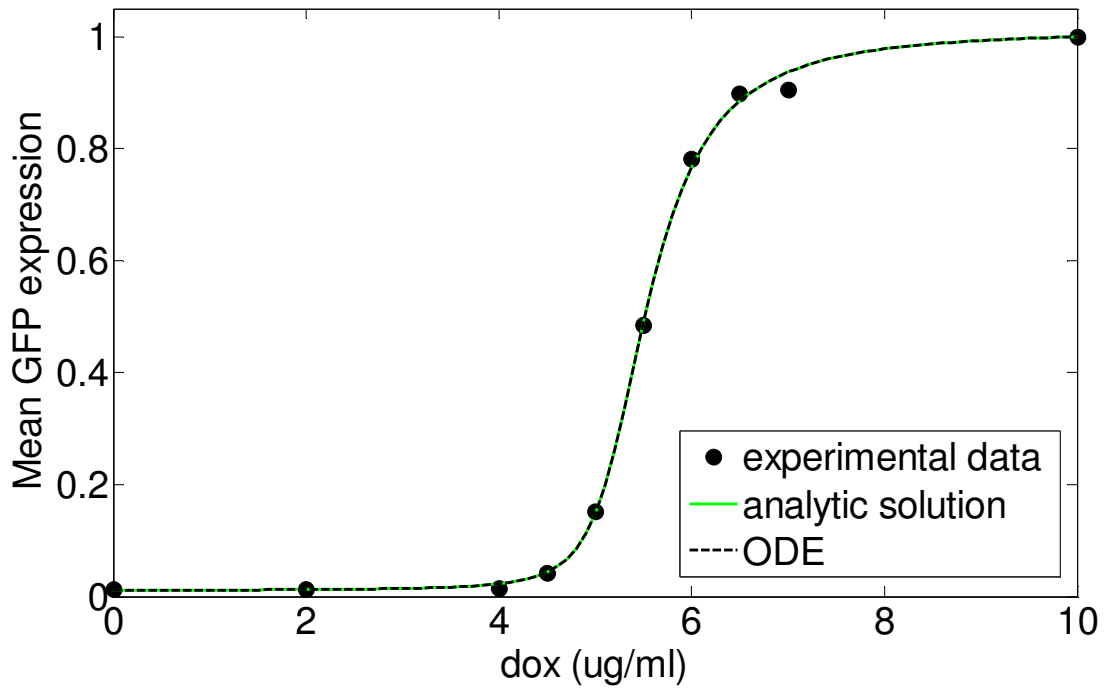

Figure S3

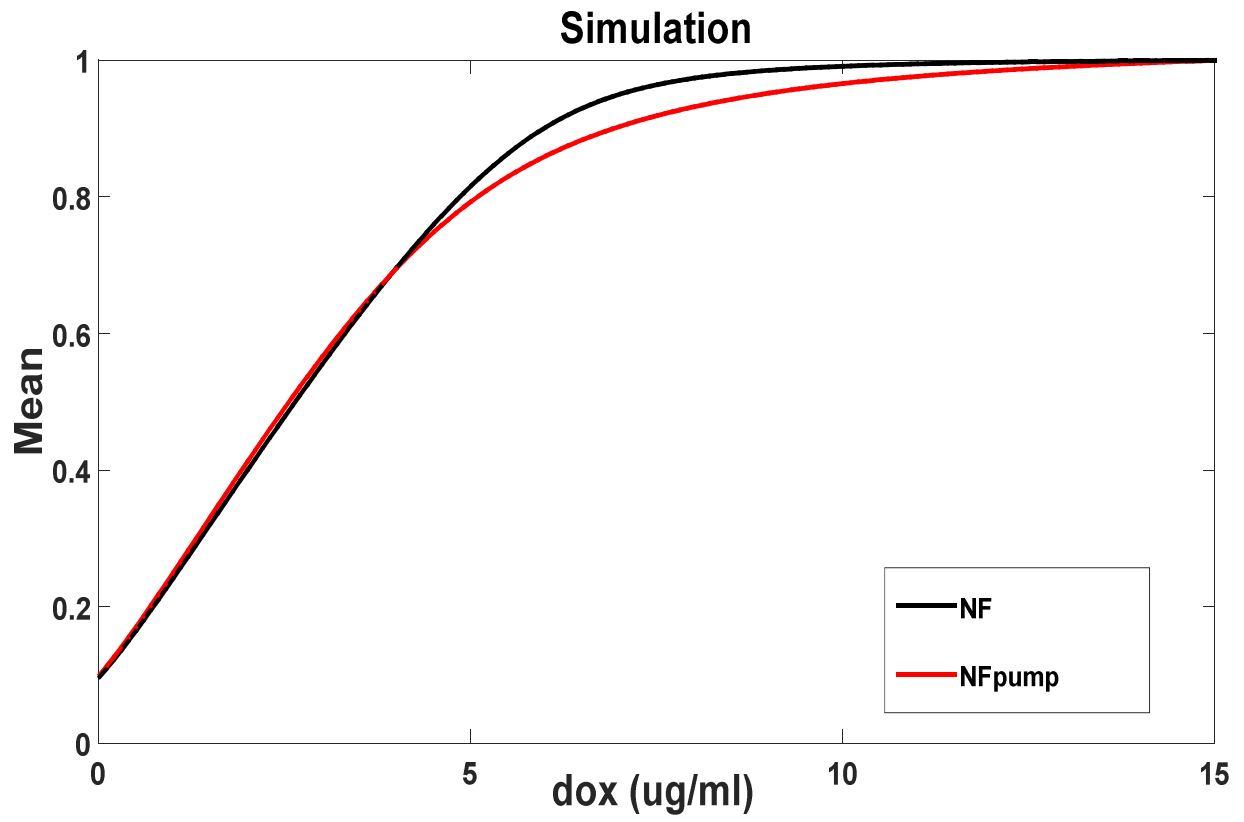

# Figure S4

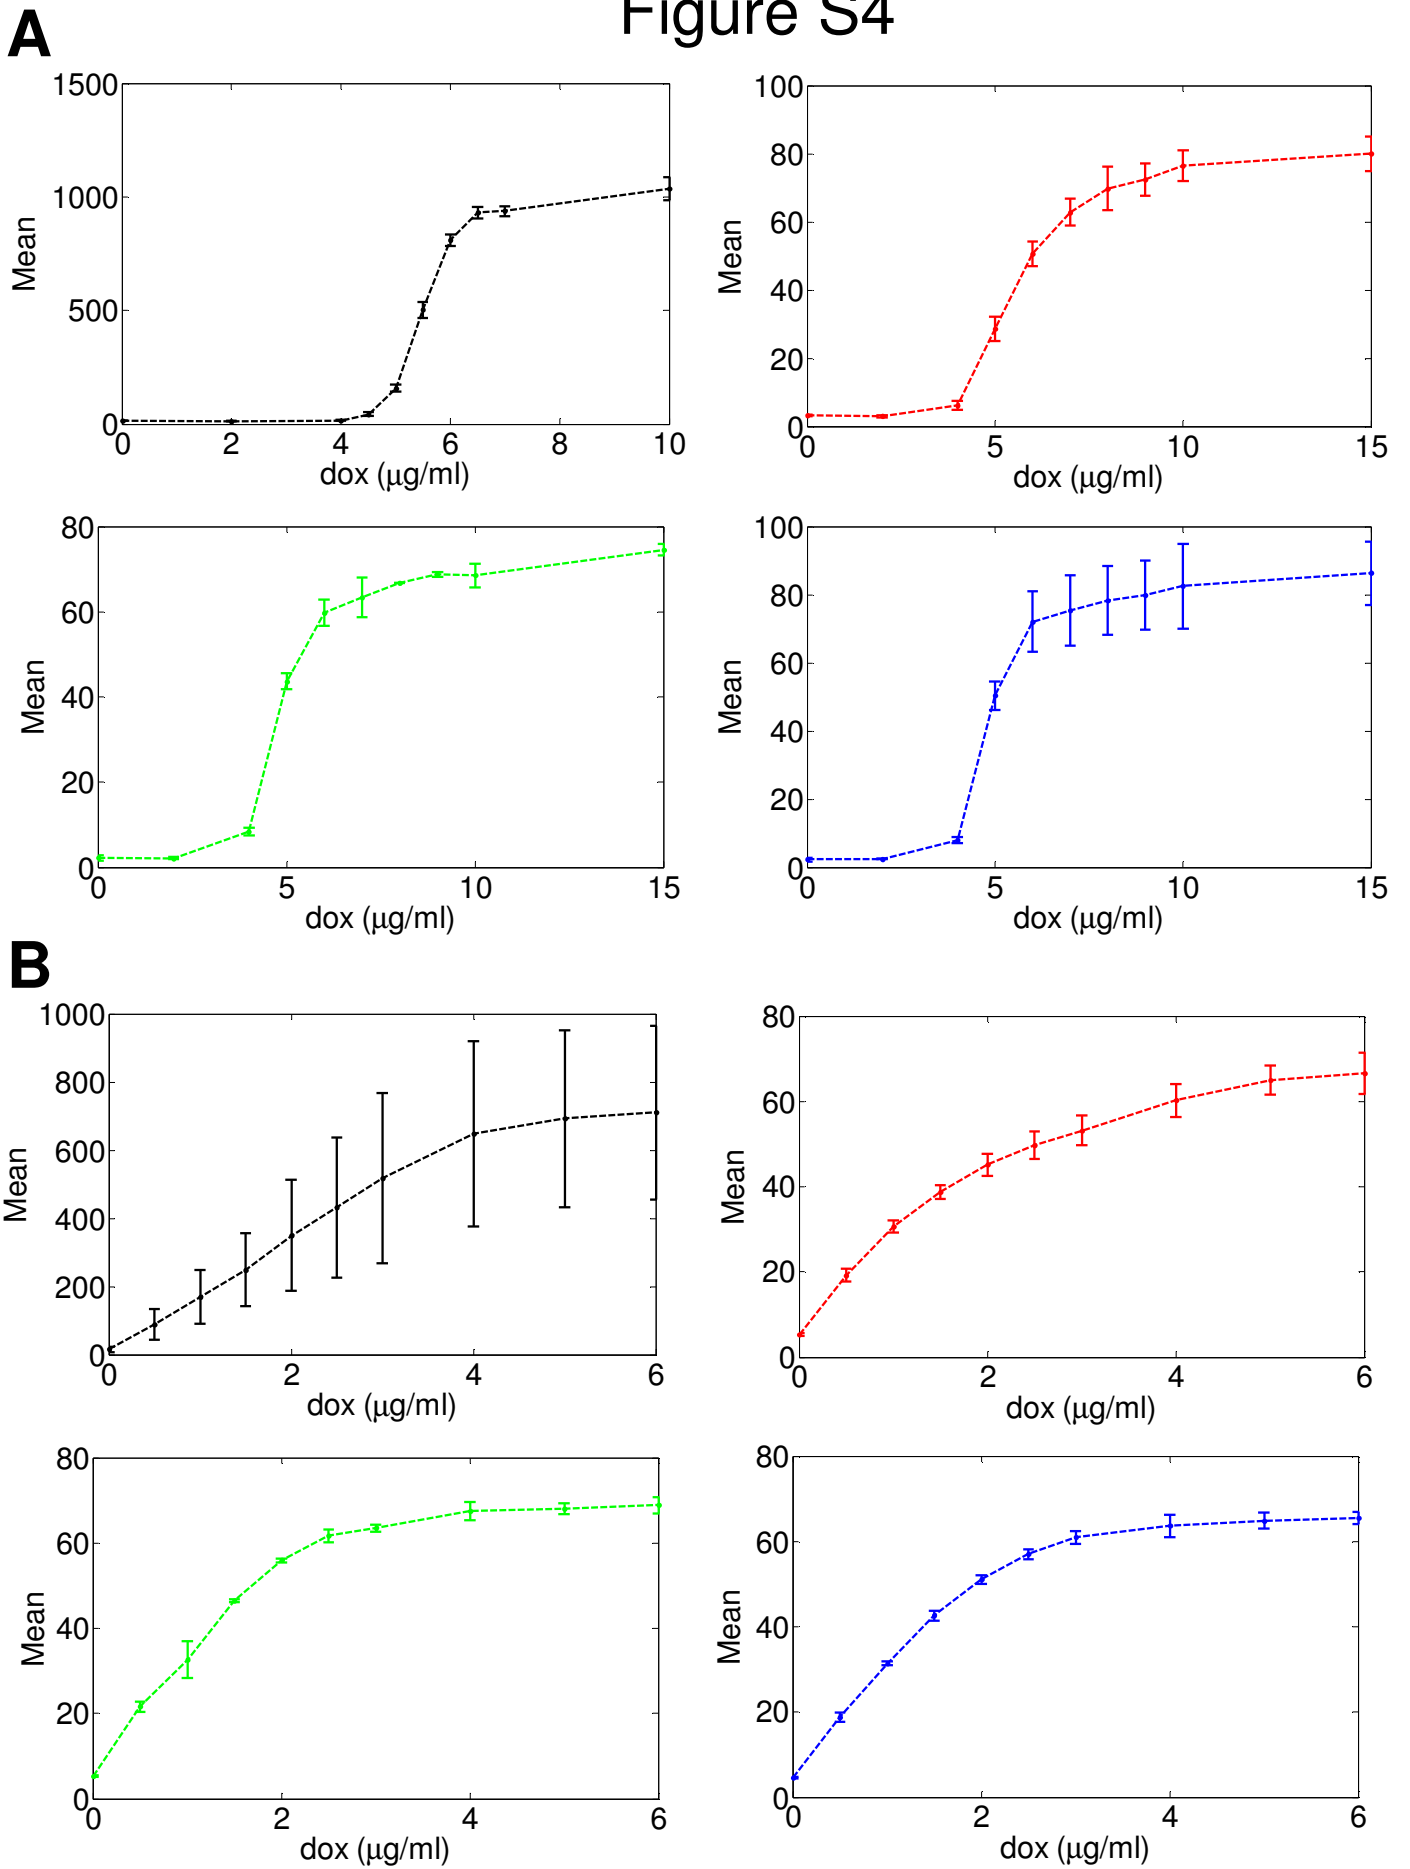

# Figure S5

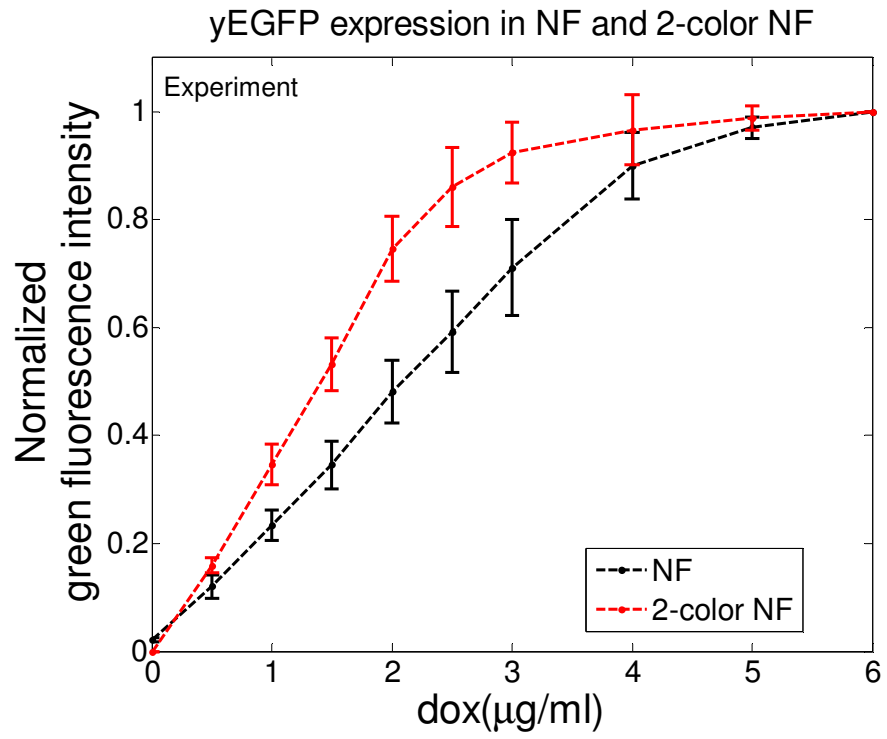



Figure S6

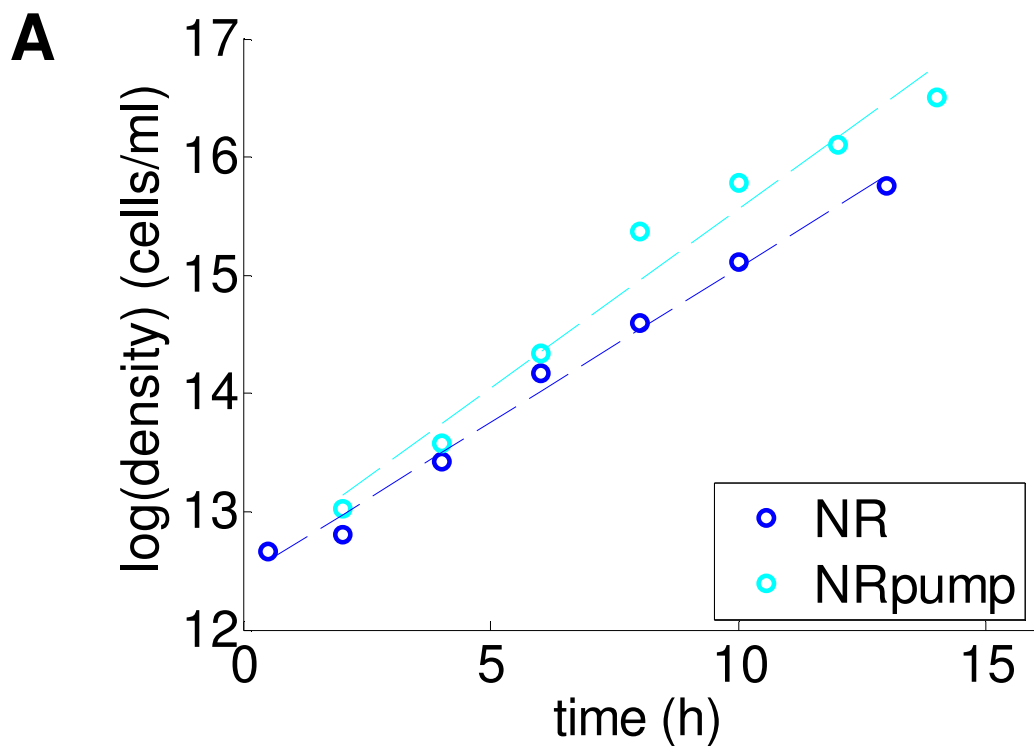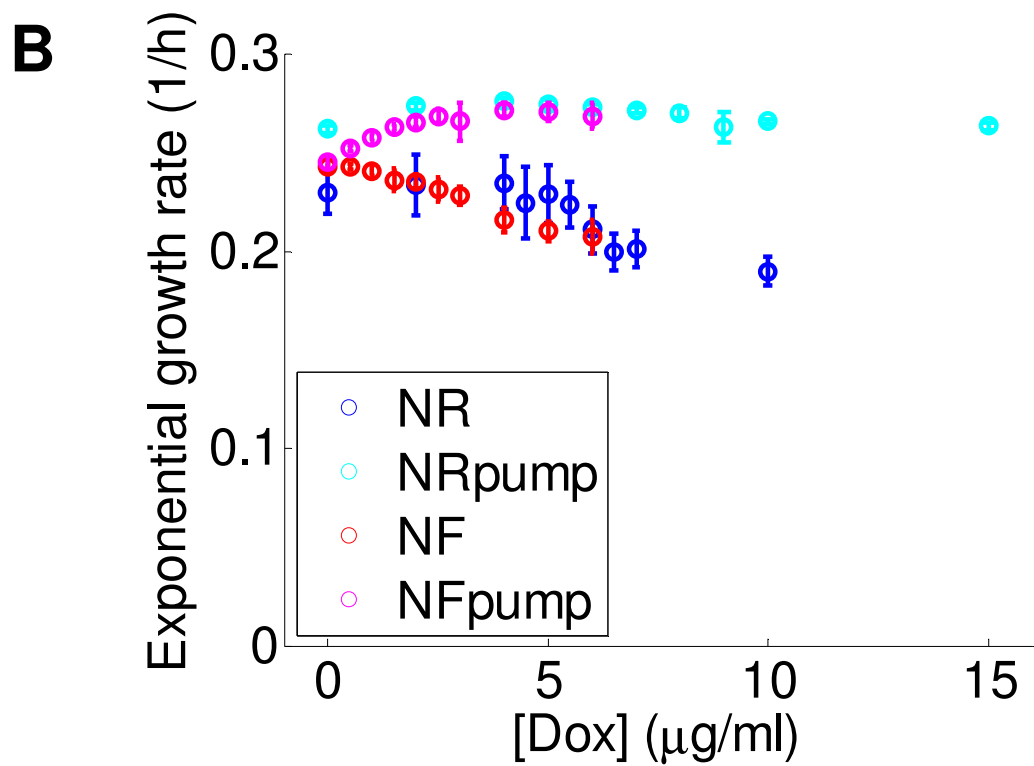

# Table S1

| Parameter   | L1-Norm Mean GFP |        |               | L1-Norm CV GFP |               |               |
|-------------|------------------|--------|---------------|----------------|---------------|---------------|
|             | -                | 0      | +             | -              | 0             | +             |
| $a_x$       | <b>1.0715</b>    | 1.5933 | 4.5405        | <b>0.2153</b>  | 0.3458        | 0.4646        |
| $a_z$       | <b>1.5756</b>    | 1.5933 | 1.6195        | <b>0.3314</b>  | 0.3458        | 0.4759        |
| $l_z$       | <b>1.5111</b>    | 1.5933 | 1.7143        | 0.6053         | <b>0.3458</b> | 0.3525        |
| $d_x = d_z$ | 1.7538           | 1.5933 | <b>1.4083</b> | <b>0.3169</b>  | 0.3458        | 0.6501        |
| $d_y$       | <b>1.4894</b>    | 1.5933 | 1.7860        | 0.3475         | <b>0.3458</b> | 0.3469        |
| $b$         | 1.9763           | 1.5933 | <b>1.3179</b> | 0.3842         | <b>0.3458</b> | 0.3694        |
| $n$         | <b>1.4777</b>    | 1.5933 | 1.6173        | 0.3494         | <b>0.3458</b> | 0.3459        |
| $C$         | 4.4718           | 1.5933 | <b>1.0398</b> | 0.5375         | 0.3458        | <b>0.2418</b> |
| $k$         | <b>1.4667</b>    | 1.5933 | 1.7125        | 0.3597         | 0.3458        | <b>0.3368</b> |
| $h$         | 3.4265           | 1.5933 | <b>0.7894</b> | 0.4109         | <b>0.3458</b> | 0.4054        |
| $K$         | 2.0369           | 1.5933 | <b>1.1830</b> | 0.3835         | <b>0.3458</b> | 0.3815        |
| $theta_z$   | 1.6111           | 1.5933 | <b>1.4244</b> | 0.3487         | <b>0.3458</b> | 0.3660        |
